# Supplementary material for: Peritrophin-like Genes Are Associated with Delousing Drug Response and Sensitivity in the Sea Louse Caligus rogercresseyi
Source: MDPI journal article supplement (doi:10.3390/ijms232113341), 2022-11-01
Supplement: s1 [file s1]

**Table S1.** Contigs annotated as *C. rogercresseyi* peritrophin-like gene isoform.

| Gene          | Description                                          | Number of HSPs | E-value   | Accession    |
|---------------|------------------------------------------------------|----------------|-----------|--------------|
| contig10      | Peritrophin-1 [ <i>Lepeophtheirus salmonis</i> ]     | 13             | 6,16E-144 | ADD24486     |
| contig12860   | Peritrophin-1 precursor [ <i>Caligus clemensi</i> ]  | 11             | 2,00E-138 | ACO14568     |
| contig12862   | Peritrophin-1 precursor [ <i>Caligus clemensi</i> ]  | 12             | 1,53E-124 | ACO14568     |
| contig6390    | Peritrophin-1 [ <i>Lepeophtheirus salmonis</i> ]     | 12             | 5,31E-69  | ADD24486     |
| contig4172    | Peritrophin-1 [ <i>Lepeophtheirus salmonis</i> ]     | 6              | 3,86E-42  | ADD38464     |
| contig6396    | Peritrophin-1 [ <i>Lepeophtheirus salmonis</i> ]     | 11             | 7,08E-37  | ADD24486     |
| contig8519    | Peritrophin-1 precursor [ <i>Caligus clemensi</i> ]. | 11             | 1,58E-34  | ACO14568     |
| contig4785    | Peritrophin-1 [ <i>Lepeophtheirus salmonis</i> ].    | 6              | 2,25E-07  | ADD38464     |
| contig4784    | Peritrophin-1 [ <i>Lepeophtheirus salmonis</i> ].    | 5              | 2,48E-07  | ADD38464     |
| Contig0008088 | TSA: CPAP [ <i>Lepeophtheirus salmonis</i> ]         | 13             | 7,53E-169 | HACA01011048 |
| Contig0074192 | TSA: CPAP [ <i>Lepeophtheirus salmonis</i> ]         | 14             | 1,53E-117 | HACA01011048 |
| Contig0002090 | CPAP [ <i>Tribolium castaneum</i> ]                  | 11             | 2,44E-101 | NM_001080099 |
| Contig0024461 | TSA: CPAP [ <i>Lepeophtheirus salmonis</i> ]         | 13             | 3,78E-101 | HACA01028014 |
| Contig0003224 | TSA: partial CPAP [ <i>Lepeophtheirus salmonis</i> ] | 9              | 1,67E-99  | HACA01018620 |
| Contig0016844 | TSA: CPAP [ <i>Lepeophtheirus salmonis</i> ]         | 14             | 6,27E-99  | HACA01011048 |
| Contig0010845 | TSA: CPAP [ <i>Lepeophtheirus salmonis</i> ]         | 18             | 1,39E-95  | HACA01011048 |

CPAP: Cuticular Protein Analogous to Peritrophins
